# Supplementary material for: Advancing Forest Fragmentation Analysis: A Systematic Review of Evolving Spatial Metrics, Software Platforms, and Remote Sensing Innovations
Source: Research Square preprint supplement (doi:10.21203/rs.3.rs-7684385/v1), 2025-10-17
Supplement: Supplementary file 1 [file 17a22b89da0bf69fd553d3ed.docx]

**Advancing Forest Fragmentation Analysis: A Systematic Review of Evolving Spatial Metrics, Software Platforms, and Remote Sensing Innovations**

Sanjana Dutt¹*, Tarmo K. Remmel², Carlos A. Rivas³, Adriano Mazziotta⁴, Mieczysław Kunz¹

¹ Faculty of Earth and Environmental Sciences, Nicolaus Copernicus University, Toruń, Poland
² Faculty of Environmental & Urban Change, York University, Toronto, Ontario, Canada
³ Mediterranean Forest Global Change Observatory (GLOBAM), DigiFoR+—ERSAF, Department of Forestry Engineering, University of Córdoba, Campus de Rabanales, Crta. IV Km 396, 14071 Córdoba, Spain
⁴ Natural Resources Institute Finland (Luke), Latokartanonkaari 9, FI-00790 Helsinki, Finland

*Corresponding author*:* [sanjana.dutt@doktorant.umk.pl](mailto:sanjana.dutt@doktorant.umk.pl)

*Corresponding author: sanjana.dutt@doktorant.umk.pl*

**Supplementary Table S1.**
Search queries used for the systematic review across Google Scholar, Scopus, and Web of Science.

| Source | Query ID | Mandatory Terms | Alternative Terms (OR) | Excluded Terms |
| --- | --- | --- | --- | --- |
| Google Scholar | 1 | “forest fragmentation” | “new tools”, “new methods”, “emerging tools”, “software for spatial analysis” | – |
|  |  |  | “GIS”, “remote sensing” |  |
|  | 2 |  | “FRAGSTATS”, “GuidosToolbox”, “MSPA”, “Patch Analyst”, “PolyFrag”, “VecLI”, “ZonalMetrics”, “Landscape Fragmentation Tool”, “V-LATE”, “morphological image processing” | – |
|  | 3 |  | “spatial analysis”, “spatial pattern detection”, “landscape structure analysis”, “landscape metrics”, “patch analysis”, “morphological analysis”, “fragmentation indices” | – |
| Scopus & Web of Science | 1 | “forest loss” or “forest fragmentation” | “new tools”, “new methods”, “emerging tools”, “software for spatial analysis” | – |
|  | 2 |  | “FRAGSTATS”, “GuidosToolbox”, “MSPA”, “Patch Analyst”, “PolyFrag”, “VecLI”, “ZonalMetrics”, “Landscape Fragmentation Tool”, “V-LATE”, “morphological image processing” | “urban”, “animal”, “bird”, “wetland”, “land use” |
|  | 3 |  | “spatial analysis”, “spatial pattern detection”, “landscape structure analysis”, “landscape metrics”, “patch analysis”, “morphological analysis”, “fragmentation indices” | “urban”, “insect”, “bird”, “climate”, “disease”, “soil”, “ecosystem services”, “peatland”, “land use” |

**Supplementary Table S2. Evolution of software/toolsets for forest fragmentation analysis (by period)**

| **Period** | **Toolset** | **Platform Notes** | **Features** | **References** |
| --- | --- | --- | --- | --- |
| **Pre-2000** | pMAP GIS; **FRAGSTATS**; Patch Analyst & Habitat Analyst | Custom GIS; Arc/Info AML, C; ArcView plug-ins | Patch/class/landscape metrics (area, edge, shape, core); GISfrag proximity; habitat valuation; contagion & nearest-neighbor | Ripple et al. (1991); McGarigal & Marks (1995); Elkie et al. (1999) |
|  | **Khoros® Image Processing** | Image-processing environment | Simulated landscapes; metric correlation; ecological response tests | Hargis et al. (1999) |
| **2000–2009** | **ArcIMS + FRAGSTATS** | Web-GIS; desktop program | Web mapping; LISA integration; patch/class/landscape indices | Wang (2002); Southworth et al. (2004) |
|  | **ERDAS IMAGINE, IDRISI, eCognition** | RS & GIS; OBIA | Classification/segmentation; early LiDAR-derived canopy metrics; early CA–Markov | Maier et al. (2006); Meddens et al. (2008) |
|  | **GUIDOS Toolbox / APACK** | Program; command-line | MSPA (core, edge, islet, loop, bridge, perforation); moving-window metrics (FAD, entropy); continental assessments | Vogt et al. (2007); Wulder et al. (2008); Ostapowicz et al. (2008) |
|  | **RULE (neutral map generator)** | Stand-alone | MSPA for phase transitions; (multi)fractal segmentation | Riitters et al. (2009) |
|  | **Circuitscape / Linkage Mapper** | Python; ArcGIS/QGIS tools | Circuit-theory connectivity; current flow; corridor/linkage mapping | McRae et al. (2008) |
|  | **Conefor** | GUI/CLI | Graph connectivity (PC, IIC, dI); node/edge prioritization; pairs with MSPA | Saura & Torné (2009) |
| **2010–2019** | **Landscape Fragmentation Tool (LFT)** | ArcGIS extension | Core/edge/perforated/patch classes; morphological segmentation of intensity | Kopecká & Nováček (2010); Singh et al. (2017) |
|  | **ARC/INFO GRID; FRAGSTATS v3.3; PolyFrag; ZonalMetrics; G-RaFFe** | GIS modules; ArcMap toolbox (Python) | Cross-tab & temporal analyses; vector-based metrics; customizable edge width; process-based pattern simulators | Tang et al. (2012); MacLean & Congalton (2013); Pe’er et al. (2013); Adamczyk & Tiede (2017) |
|  | **Definiens Developer** | Image analysis software | OBIA classification; advanced rulesets | Newman et al. (2011) |
|  | **LecoS; ShrinkShape2; landscapemetrics; motif; PyLandStats** | QGIS plug-in; R/SAGA; Python | Automated landscape metrics; rotation-invariant polygon shape spectra; tidy/testable pipelines; pattern-based analysis | Jung (2016); Remmel (2015); Hesselbarth et al. (2019); Lovelace et al. (2019); Bosch (2019) |
|  | **Landscape Generator (LG); DYPAL** | Java; Python | Neutral/optimized landscape generation; parameterizable dilation/erosion | van Strien et al. (2016); Bonhomme et al. (2017) |
|  | **SPIP (surface metrics)** | Stand-alone | Gradient-surface metrics (roughness, fractal dimension) | Kedron et al. (2018) |
|  | **Land-metrics DIY (library)** | .NET/C# API (OpenGIS SFA) | ~40 vector/raster metrics; extensible, platform-independent programming library | Zaragozí et al. (2012) |
|  | **Gradient-surface threshold scalograms (FRAGSTATS + GSM)** | FRAGSTATS v4.x + GSM workflow | Thresholded continuous canopy; scalograms of MPS/PD/LPI/ED across density bands | Frazier & Kedron (2017) |
|  | **r.pi (GRASS GIS)** | GRASS add-on | Semi-automatic pattern analysis (core area, PD, connectivity) | Wegmann et al. (2018) |
|  | **VCT; LandTrendr; CCDC (change feeders)** | Algorithms; GEE/desktop ports | Time-series segmentation (loss/recovery) and continuous change models | Huang et al. (2010); Kennedy et al. (2018); Zhu & Woodcock (2014) |
|  | **Google Earth Engine (platform)** | Cloud platform | Planetary-scale compositing, time series, and reproducible workflows | Gorelick et al. (2017) |
| **2020–2025** | **Patternbits (ShapePattern); geodiv; Intra** | R packages | Configuration elements & KL divergence; 3-D-ready morphological segmentation; gradient surface metrics; complexity-weighted patch area (intra-patch connectivity) | Remmel (2020, 2022); Smith et al. (2021); Justeau-Allaire et al. (2024) |
|  | **VecLI; VARLI; LDTtool; LDT4QGIS** | Python; QGIS/ArcGIS | Vector indices (area–edge, shape, aggregation); composition/configuration change typologies; perimeter–area corrections | Yao et al. (2022); Machado et al. (2020); Paixão & Machado (2023); Huang et al. (2024) |
|  | **flsgen** | Java API; R; CLI | Neutral landscape generator with control of 14 indices (incl. MESH, Splitting) | Justeau-Allaire et al. (2022) |
|  | **ForestryAnalysisInR; Patch Fragmentation Index (PFI)** | R (Shiny) | Forestry/fragmentation workflows; biodiversity & LiDAR structural metrics; simple patch fragmentation index | Atkins et al. (2022); Rivas et al. (2022) |
|  | **GUIDOS Toolbox Workbench (GWB)** | Program; QGIS plug-in; C/GDAL | MSPA expansions; distance & similarity; Jensen–Shannon multiscale similarity; large-area workbench | Vogt et al. (2022); Netzel et al. (2024); Zhang et al. (2024, 2025) |
|  | **FAD–FOS pipelines (fixed-scale density)** | GUIDOS + scripts | Forest Area Density classes & summaries (policy-scale, fixed window) | Vogt & Caudullo (2025) |
|  | **Fractal/Disorder toolchains (FFI/FFDI/LCFD)** | ImageJ2/ComsystanJ; Python/ArcGIS | Compactness & spatial disorder; local connectedness; robust to binary artifacts | Peptenatu et al. (2023); Alage et al. (2025) |
|  | **ENVI & GeoDa; MapBiomas & IDRISI (FFCI)** | RS & spatial analysis | PCA-based composite indices; ANN & CA–Markov forecasting | Lin et al. (2024); Moreira et al. (2024) |
|  | **Fiji/ImageJ2 + ComsystanJ (3-D)** | Image analysis | Voxel-based 3-D fragmentation; fractal dimension; succolarity | Andronache (2024) |
|  | **ESIS/Imalys; AMAPVox (TLS)** | Python/C++; TLS processing | Hybrid PMM–GM toolkit; NDVI/NIRv; voxelized TLS for PAI; phenology impacts | Selsam et al. (2024); Nunes et al. (2022) |
|  | **LFT (applications)** | ArcGIS extension | Recent use-cases of LFT in susceptibility mapping | Batar et al. (2021) |
|  | **ProNet scripts; LandTrendr (recent apps)** | R/Python; GEE | Protected-area network connectivity metric; provincial LandTrendr deployments | Theobald et al. (2022); Qiu et al. (2025) |
